# Supplementary material for: MutMapPlus identified novel mutant alleles of a rice starch branching enzyme IIb gene for fine‐tuning of cooked rice texture
Source: PubMed Central journal article supplement (PMC5785365; doi:10.1111/pbi.12753), 2017-06-14
Supplement: PBI-16-111-s002.pdf [file PBI-16-111-s002.pdf]

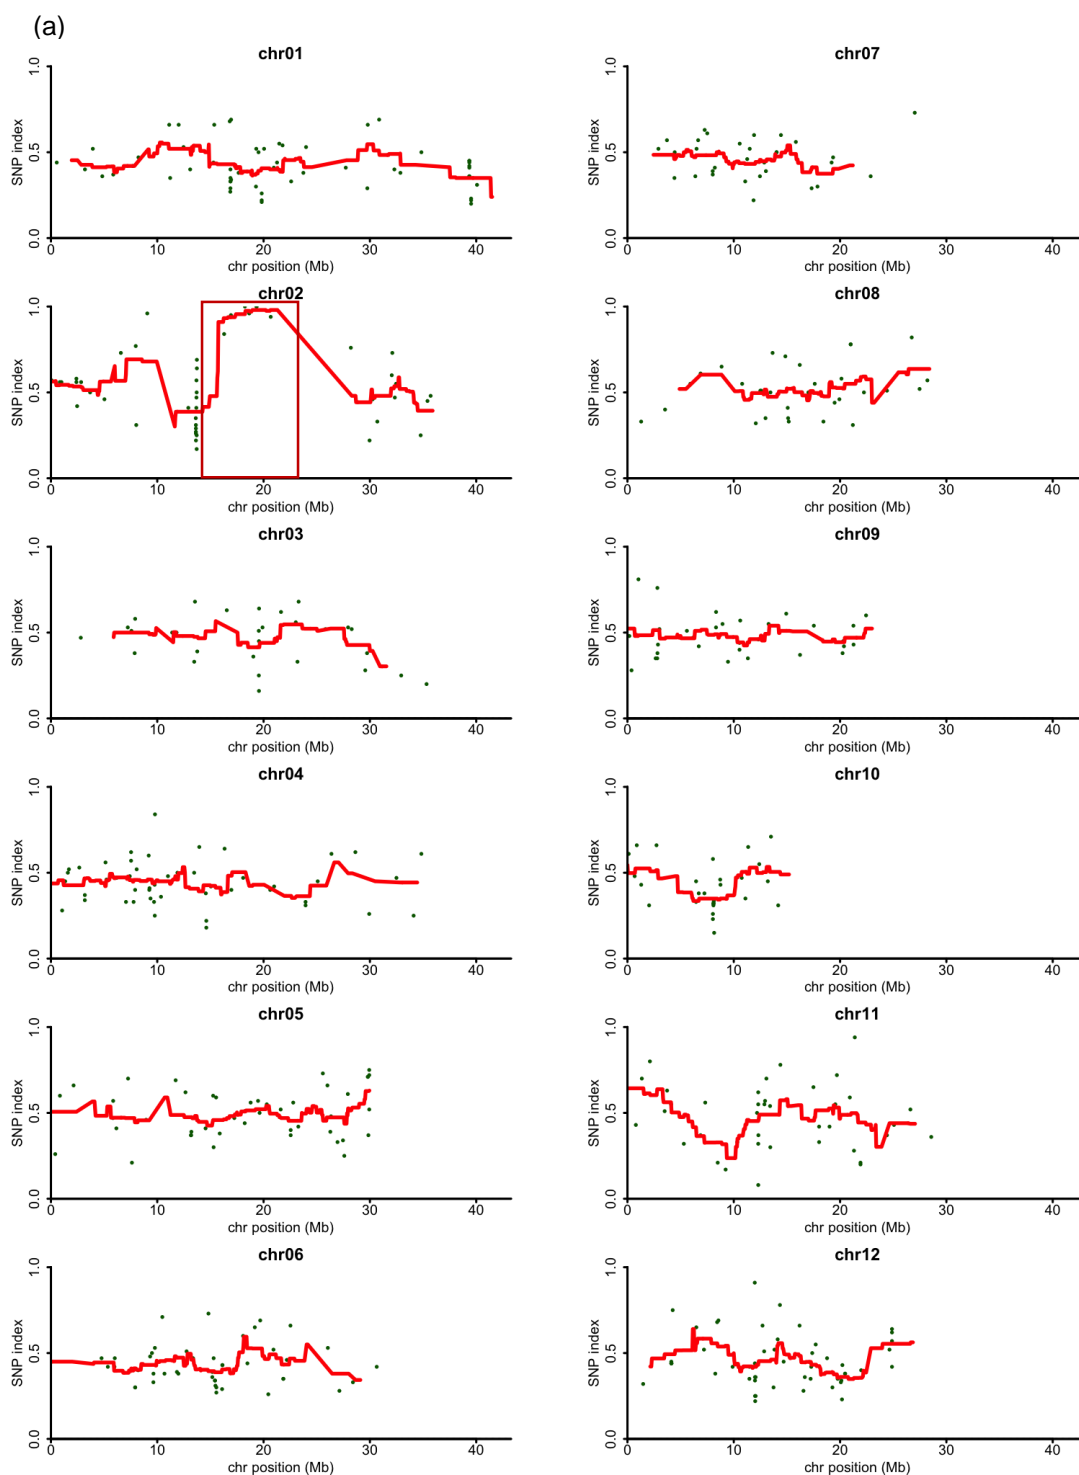

**Figure S2.** SNP index and  $\Delta$ (SNP index) plots of rice chromosomes generated by MutMapPlus analysis of *age1*.

SNP index and  $\Delta$ (SNP index) plots were generated by MutMapPlus analysis of bulked F2 mutant progeny obtained by a crossing between *age1* and Nipponbare. (a) SNP index of the mutant (M) bulk. (b) SNP index of the wild-type (WT) bulk. (c)  $\Delta$ (SNP index) calculated by subtraction of the index of WT bulk from that of M bulk. Red lines indicate average value of SNP index or  $\Delta$ (SNP index) obtained by the sliding window analysis of 4 Mb intervals with 50 kb increment. Candidate region confined by the Fisher's *P* value of  $<0.05$  is indicated with a red box.

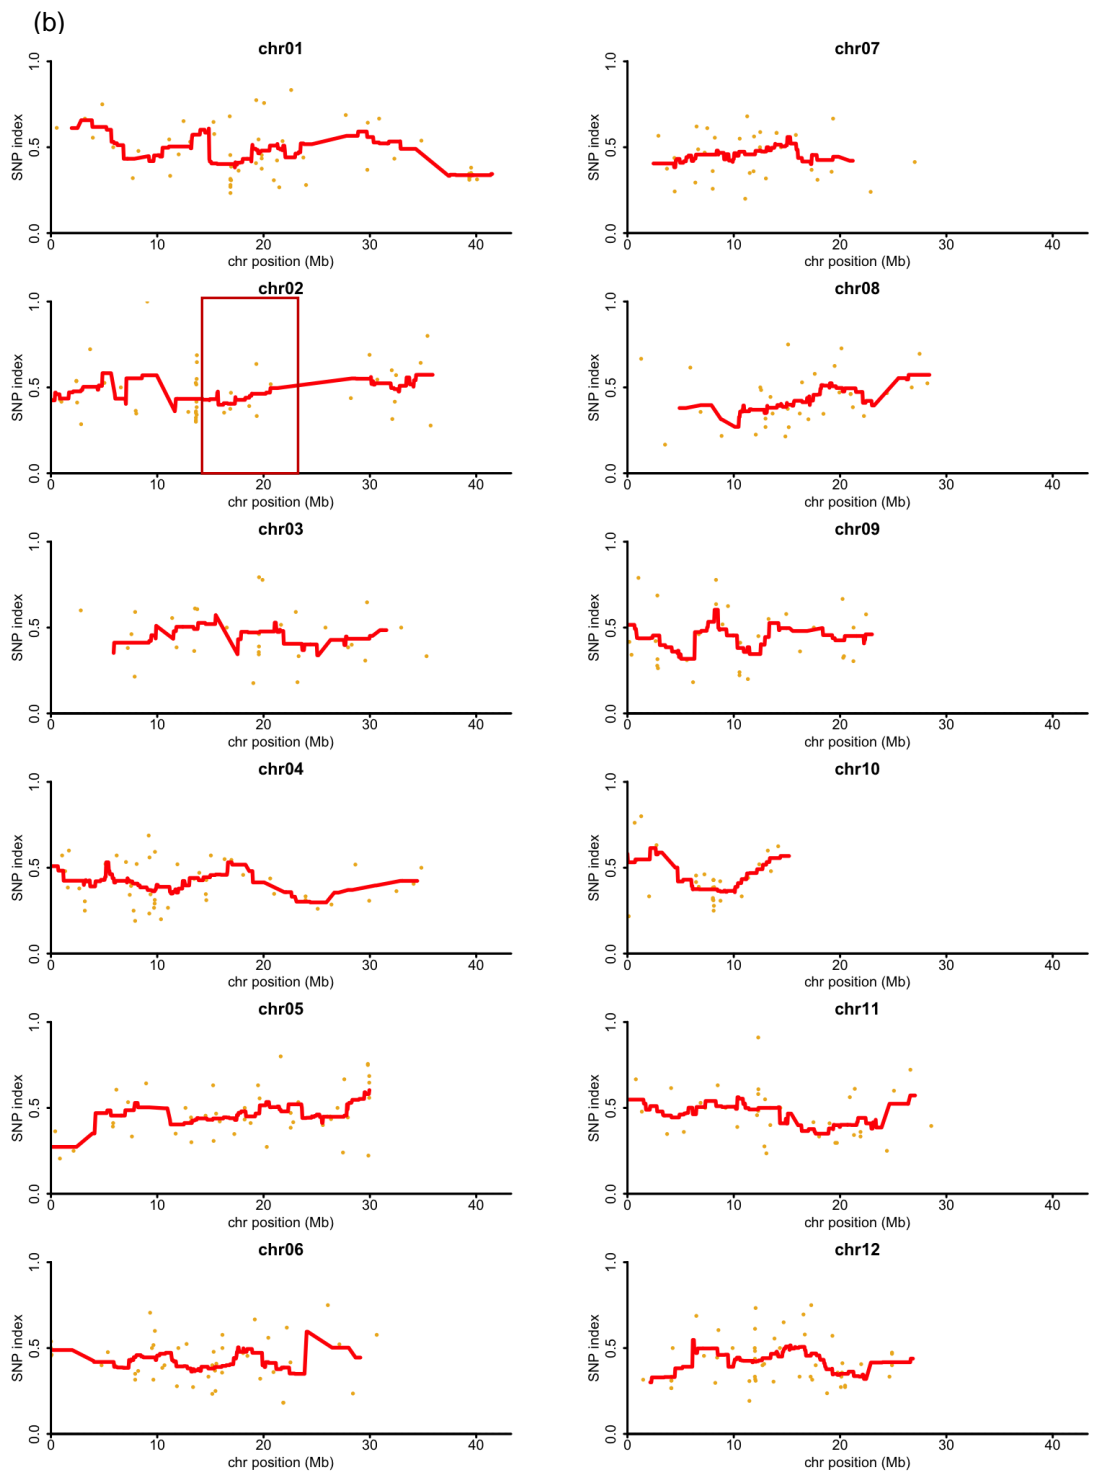

**Figure S2.** (Continued)

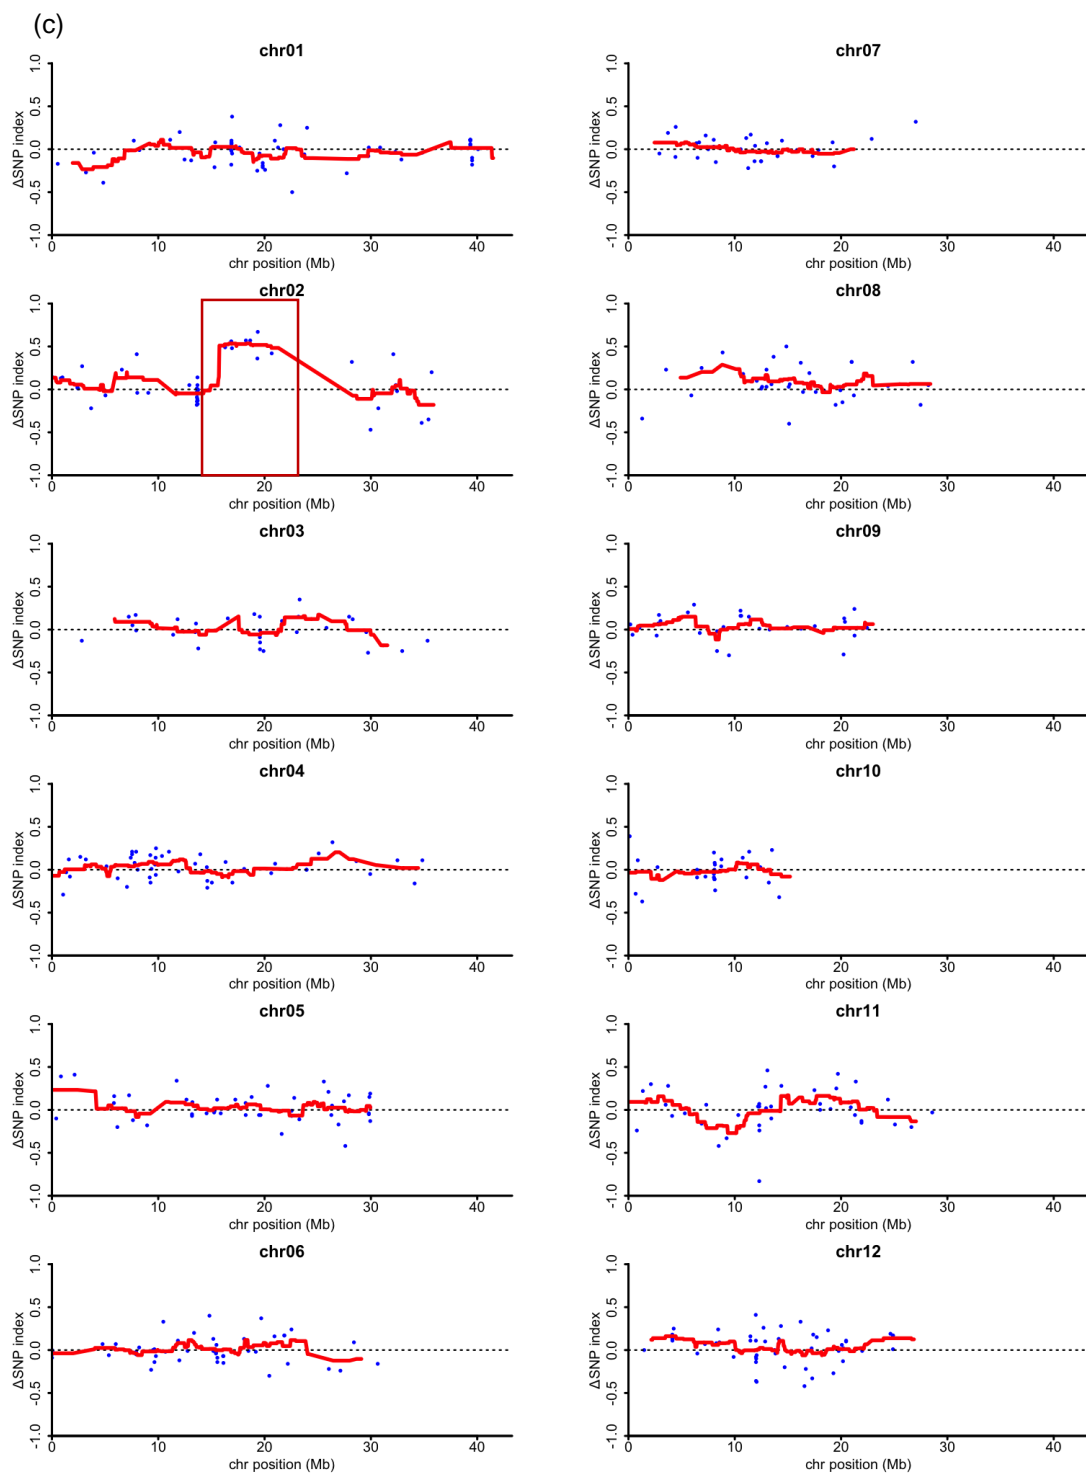

Figure S2. (Continued)
