# Supplementary material for: MutMapPlus identified novel mutant alleles of a rice starch branching enzyme IIb gene for fine‐tuning of cooked rice texture
Source: PubMed Central journal article supplement (PMC5785365; doi:10.1111/pbi.12753), 2017-06-14
Supplement: PBI-16-111-s003.pdf [file PBI-16-111-s003.pdf]

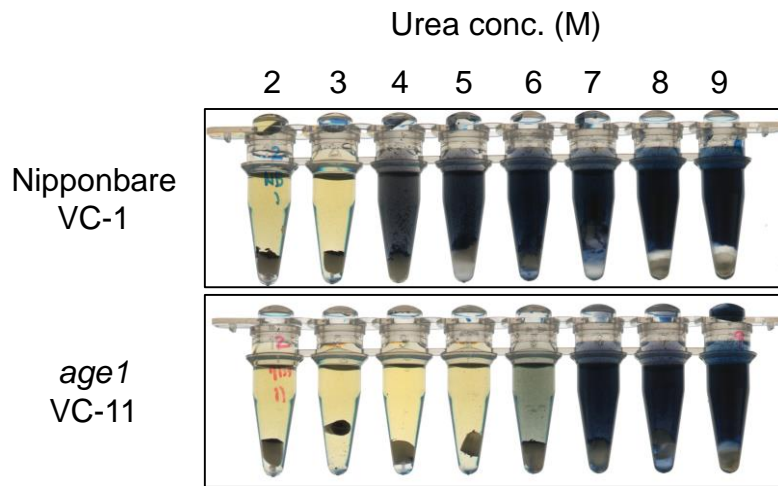

**Figure S3.** Investigation of urea concentration for gelatinization of starch of vector control lines of Nipponbare and *age1*. Halved rice grains were incubated with various concentrations of urea solution overnight and gelatinization of starch was evaluated by iodine staining. Transgenic plants were grown in a greenhouse. Temperatures after flowering were set at 27° C/22° C during 15 h light/9 h dark periods, respectively.
