# Supplementary material for: MutMapPlus identified novel mutant alleles of a rice starch branching enzyme IIb gene for fine‐tuning of cooked rice texture
Source: PubMed Central journal article supplement (PMC5785365; doi:10.1111/pbi.12753), 2017-06-14
Supplement: PBI-16-111-s005.pdf [file PBI-16-111-s005.pdf]

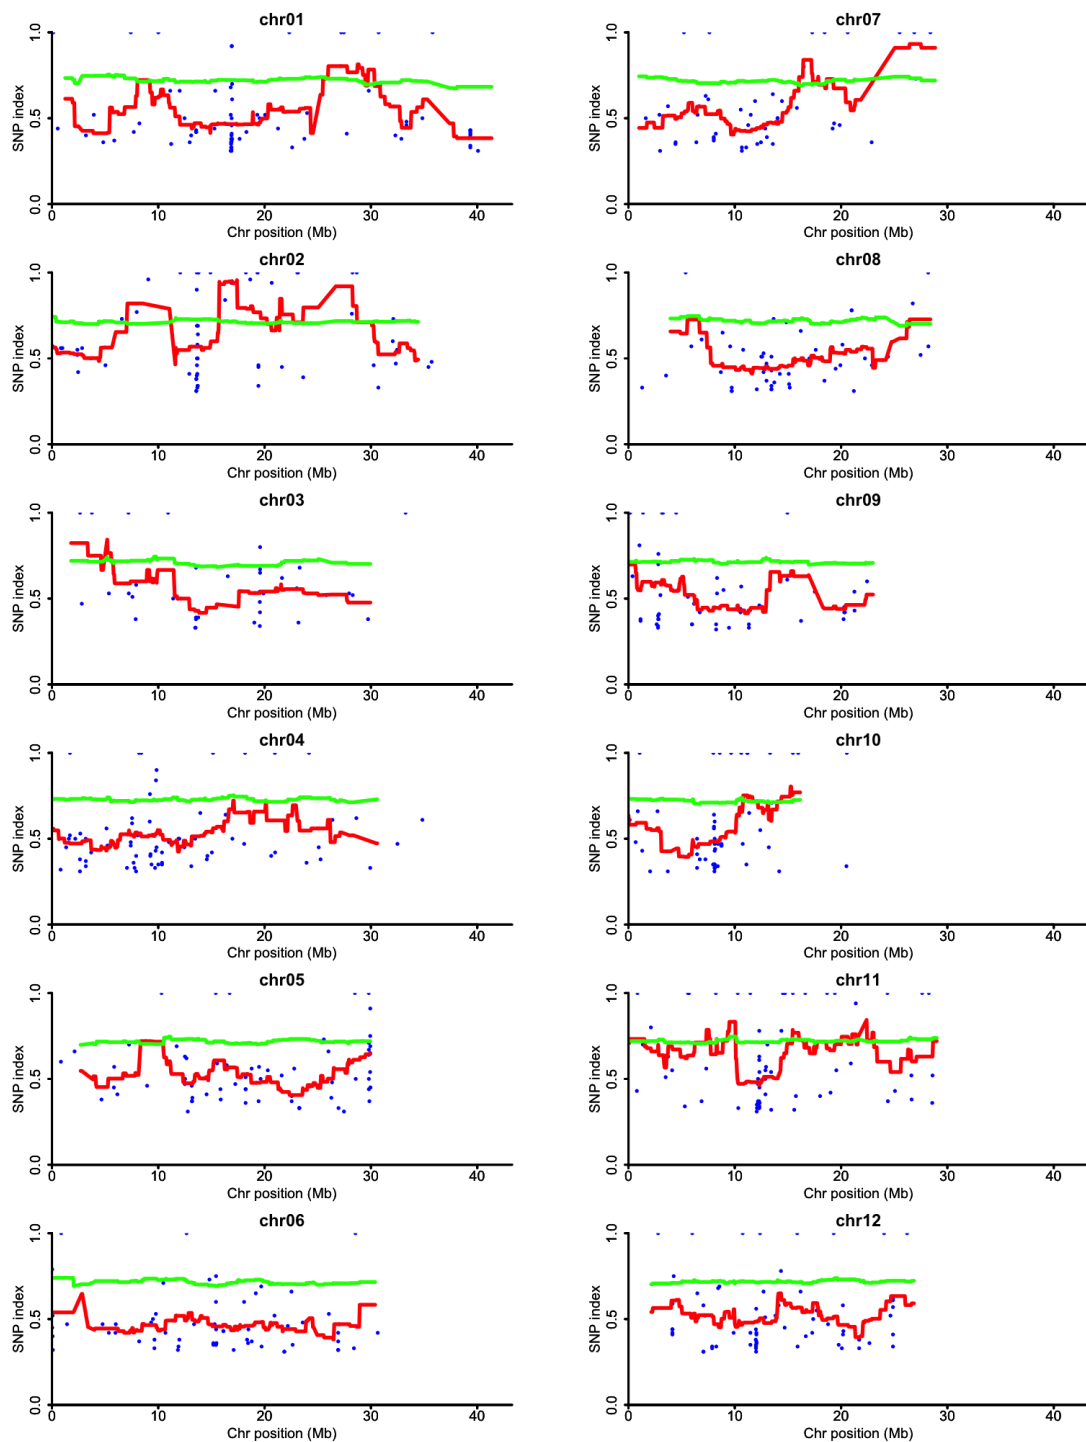

**Figure S5.** Trial of mapping *age1* mutation by MutMap analysis.

SNP index plot was generated by MutMap analysis of bulked F2 mutant progeny obtained by a crossing between *age1* and Nipponbare. Red lines indicate average value of SNP index obtained by the sliding window analysis of 4 Mb interval with 50 kb increment. Green lines represent the 95% statistical confidence limit.
