# Supplementary material for: MutMapPlus identified novel mutant alleles of a rice starch branching enzyme IIb gene for fine‐tuning of cooked rice texture
Source: PubMed Central journal article supplement (PMC5785365; doi:10.1111/pbi.12753), 2017-06-14
Supplement: PBI-16-111-s006.pdf [file PBI-16-111-s006.pdf]

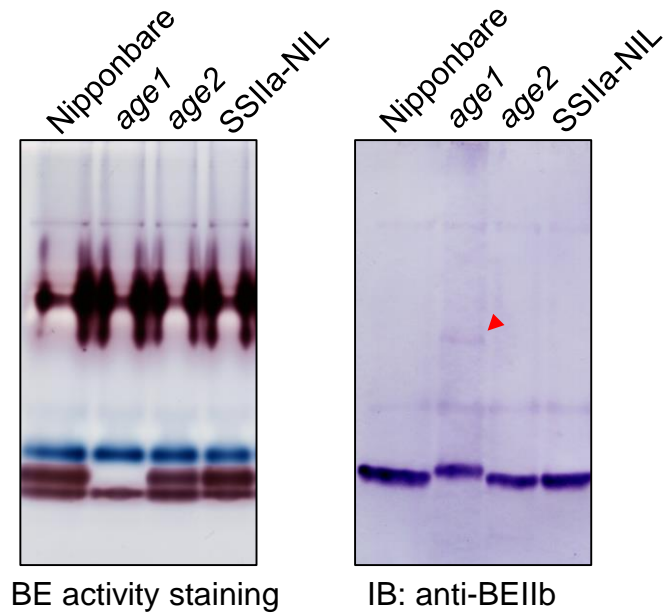

**Figure S6.** BE staining and immunoblot analyses after native-PAGE. Ten micrograms of soluble endosperm extract was separated by native-PAGE. After electrophoresis, the gels were subjected to BE activity staining or immunoblot analyses with anti-BEIIb antibody. The slight delay in the migration of the immunoreactive band of *age1* occurred probably due to the change in electrical charge by the M723K substitution. An additional band observed in *age1* was indicated by a red arrowhead.
