# Supplementary material for: MutMapPlus identified novel mutant alleles of a rice starch branching enzyme IIb gene for fine‐tuning of cooked rice texture
Source: PubMed Central journal article supplement (PMC5785365; doi:10.1111/pbi.12753), 2017-06-14
Supplement: PBI-16-111-s007.pdf [file PBI-16-111-s007.pdf]

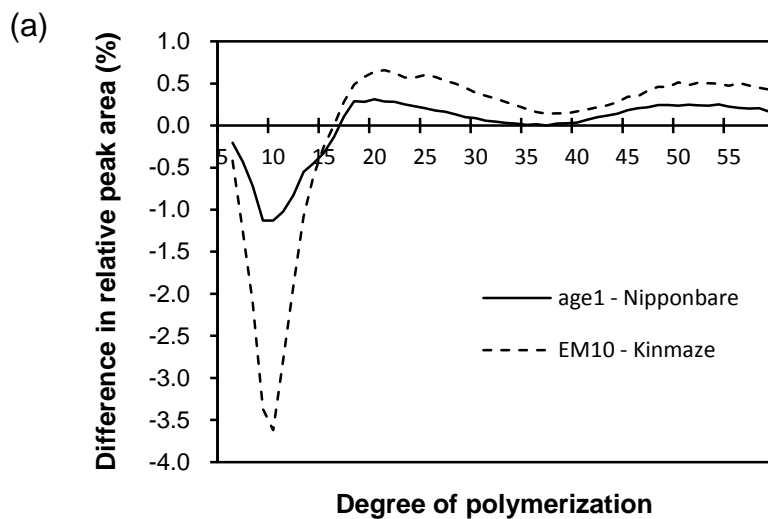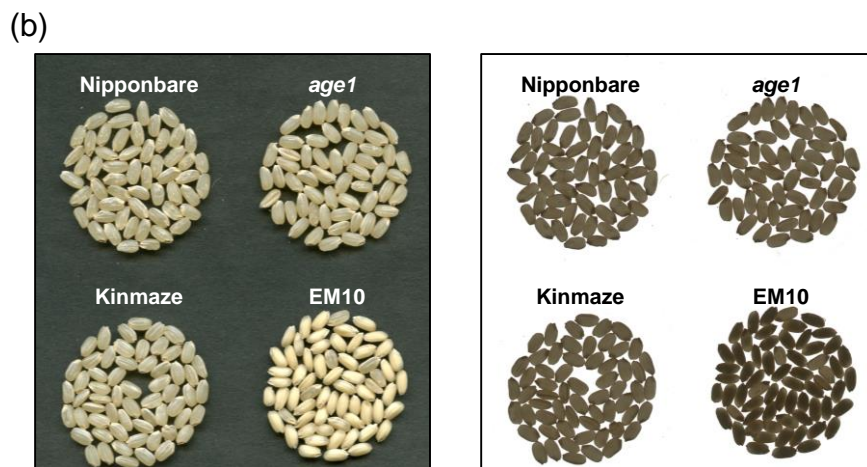

**Figure S7.** Comparison of EM10 and *age1*.

(a) The distribution of the length of amylopectin side chains was examined by HPAEC-PAD, and then the difference in the profiles between EM10 and Kinmaze or *age1* and Nipponbare was calculated by subtracting the ratio of a chain of given length of the sample with that of the mean value of Kinmaze or Nipponbare, respectively. Values are the means of three biological replicates.

(b) Grain appearance of *age1* and EM10. Images by reflected light (left panel) and transmitted light (right panel) are shown. Grains used in this experiment were ripened in a plant incubator.
